# Supplementary material for: Mass fabrication and delivery of 3D multilayer μTags into living cells
Source: PubMed Central journal article supplement — Sci Rep. 2013 Jul 26;3:2295. doi: 10.1038/srep02295 (PMC3724179; doi:10.1038/srep02295), 2013-07-26
Supplement: srep02295-s1.pdf [file srep02295-s1.pdf]

## Mass fabrication and delivery of 3D multilayer $\mu$ Tags into living cells

Lisa Y. Chen<sup>1†\*</sup>, Kokab B. Parizi<sup>1†</sup>, Hisanori Kosuge<sup>2</sup>, Kaveh M. Milaninia<sup>3</sup>, Michael V. McConnell<sup>2</sup>, H.-S. Philip Wong<sup>1</sup>, Ada S.Y. Poon<sup>1</sup>

<sup>†</sup>These authors contributed equally to this work.

<sup>1</sup>Department of Electrical Engineering, Stanford University, Stanford, CA 94305, USA, <sup>2</sup>Division of Cardiovascular Medicine, Stanford University, CA 94305, USA, <sup>3</sup>Department of Electrical and Computer Engineering, University of California, Santa Barbara, CA 93106, USA

### Supplementary Information

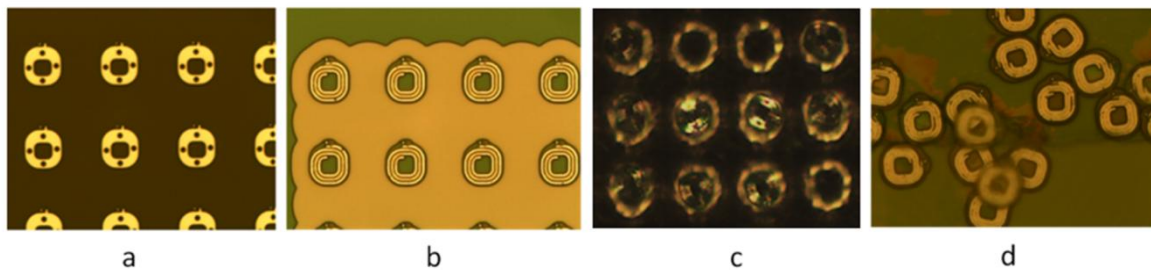

Supplementary Figure S1. Optical microscopy images of wafer after (a) first capacitance layer, (b) top oxide layer patterning steps, (c) Si substrate etching for release, and (d) released  $\mu$ Tag devices on wafer surface.

Supplementary Video S2. Time-lapse video of internalization of a round  $\mu$ Tag device, as imaged every 30 s over a 30-min period.

Supplementary Video S3. Time-lapse video of internalization of an elongated  $\mu$ Tag device, as imaged every 30 s over a 30-min period.

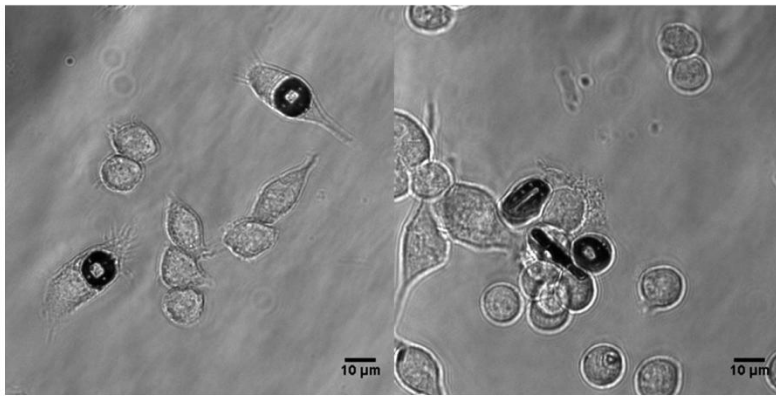

Supplementary Figure S4. Bright field microscopy images of multiple cells with internalized  $\mu$ Tag devices.

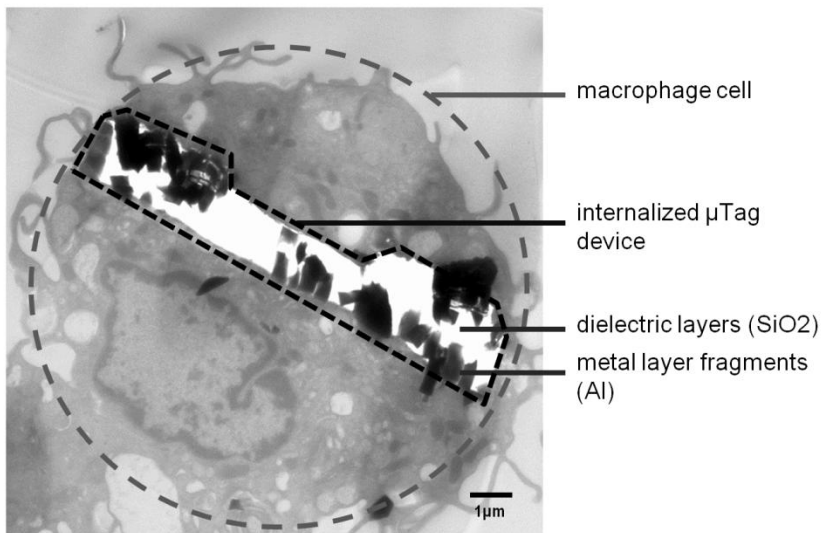

Supplementary Figure S5. Cross-sectional TEM image of a cell with internalized  $\mu$ Tag device.

Supplementary Video S6. Time-lapse video of cell with round  $\mu$ Tag device at day 5, as imaged every 5 s over a 3-min period.

Supplementary Video S7. Time-lapse video of cell with elongated  $\mu$ Tag device at day 5, as imaged every 5 s over a 3-min period.
